# Supplementary material
Source: Royal Society of Chemistry journal article supplement (doi:10.1039/d6ta02416e)
Supplement: d6ta02416e1.pdf [file d6ta02416e1.pdf]

1                   **Polyaminoanthraquinone with Modulated Iminium**  
2                   **Electron Delocalization for Efficient Electrochemical**  
3                   **Ammonium Removal**

4                   Fei Yu<sup>1,3</sup>, Tianjie Chen<sup>1</sup>, Jinfeng Chen<sup>2</sup>, Shuzhen Liang<sup>3</sup>, Peng Liu<sup>5</sup>, Jie Ma<sup>2,3,4\*</sup>

5                   <sup>1</sup> College of Oceanography and Ecological Science, Shanghai Ocean University,  
6                   No 999, Huchenghuan Road, Shanghai, 201306, P. R. China.

7                   <sup>2</sup> Research Center for Environmental Functional Materials, State Key Laboratory  
8                   of Water Pollution Control and Green Resource Recycling, College of Environmental  
9                   Science and Engineering, Tongji University, Shanghai, 200092, P. R. China.

10                  <sup>3</sup> Water Resources and Water Environment Engineering Technology Center, Xinjiang  
11                  Key Laboratory of Engineering Materials and Structural Safety, School of Civil  
12                  Engineering, Kashi University, Kashi 844000, P. R. China.

13                  <sup>4</sup> Shanghai Institute of Pollution Control and Ecological Security, Shanghai, 200092,  
14                  P.R. China.

15                  <sup>5</sup> Biolin (Shanghai) Trading Company Ltd, Rm 1205, Sandhill Plaza, Lane 2290  
16                  ZuChongzhi Road, Pudong New District, 201203 Shanghai China.

17

18                  Corresponding author: Jie Ma, E-mail: [jma@tongji.edu.cn](mailto:jma@tongji.edu.cn), Tel: +86-021-65981

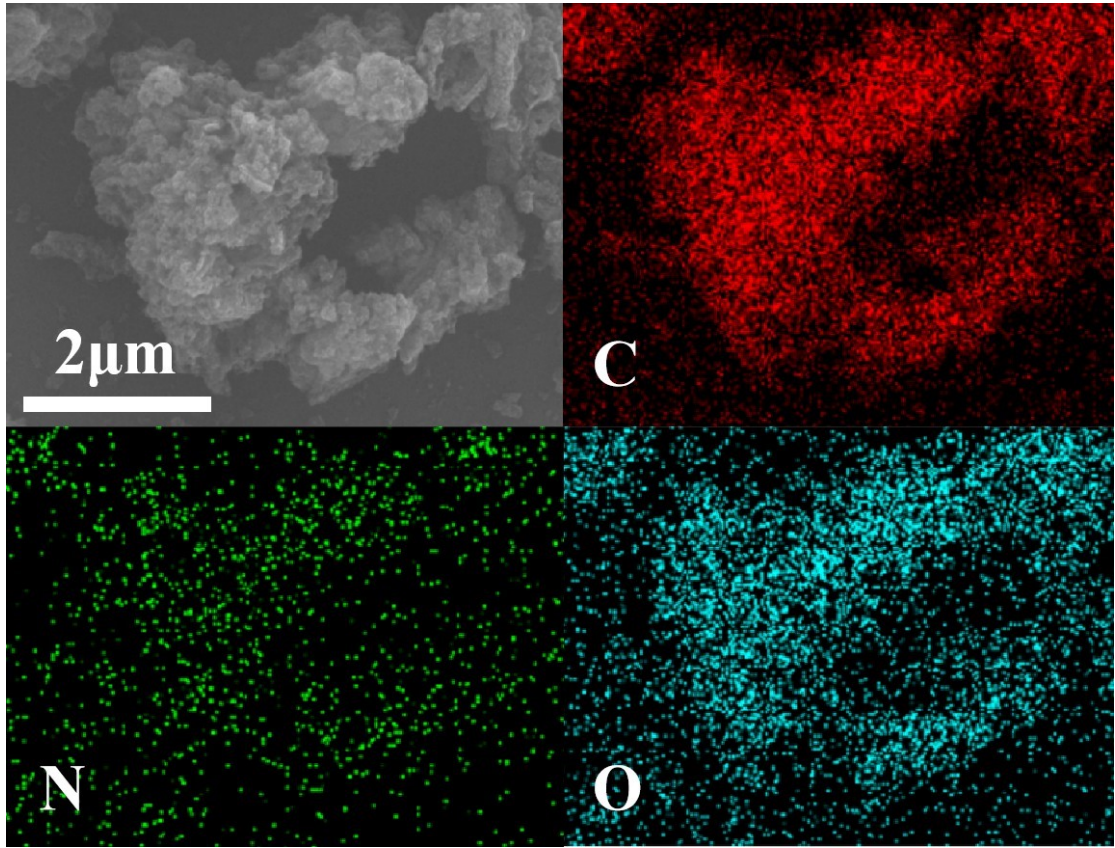

19

20

21

**Fig. S1.** SEM images of PAAQ and corresponding elemental mappings.

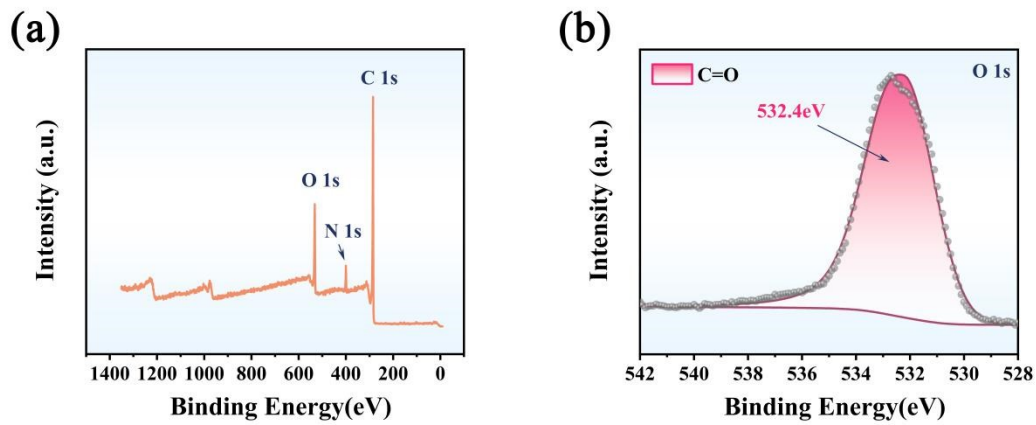

22

23 **Fig. S2.** (a) XPS survey spectra and (b) high-resolution XPS spectra of O 1s for the PAAQ.

24

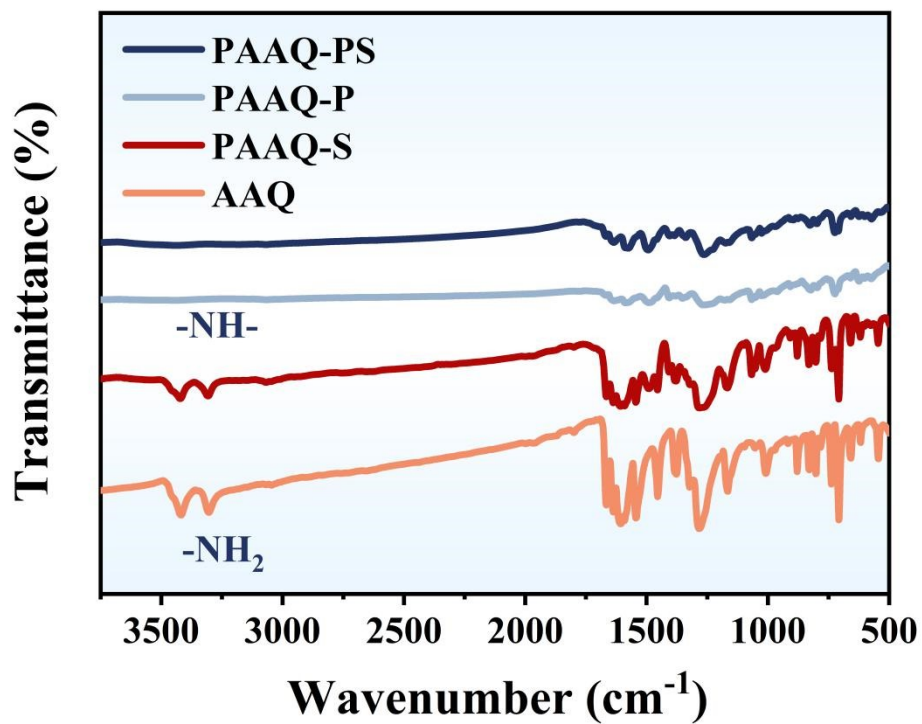

25

26

27

Fig. S3. FTIR spectroscopy of organic materials.

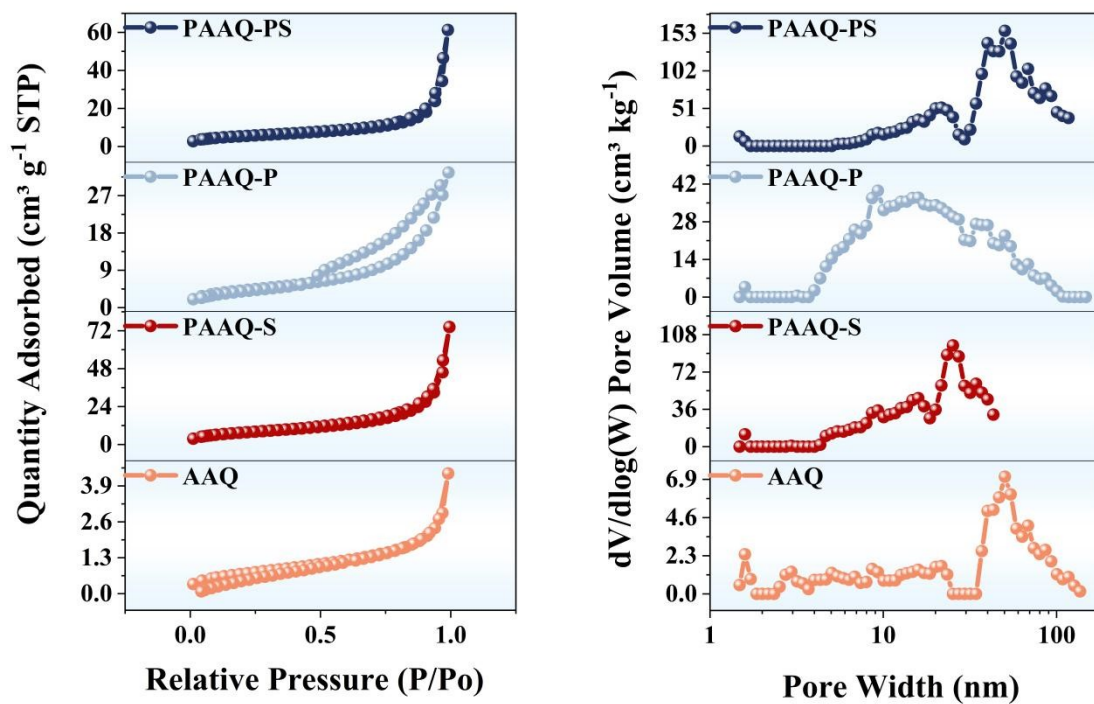

28

29 Fig. S4. (a)  $N_2$  adsorption/desorption isotherms and (b) pore size distribution of organic materials.

30

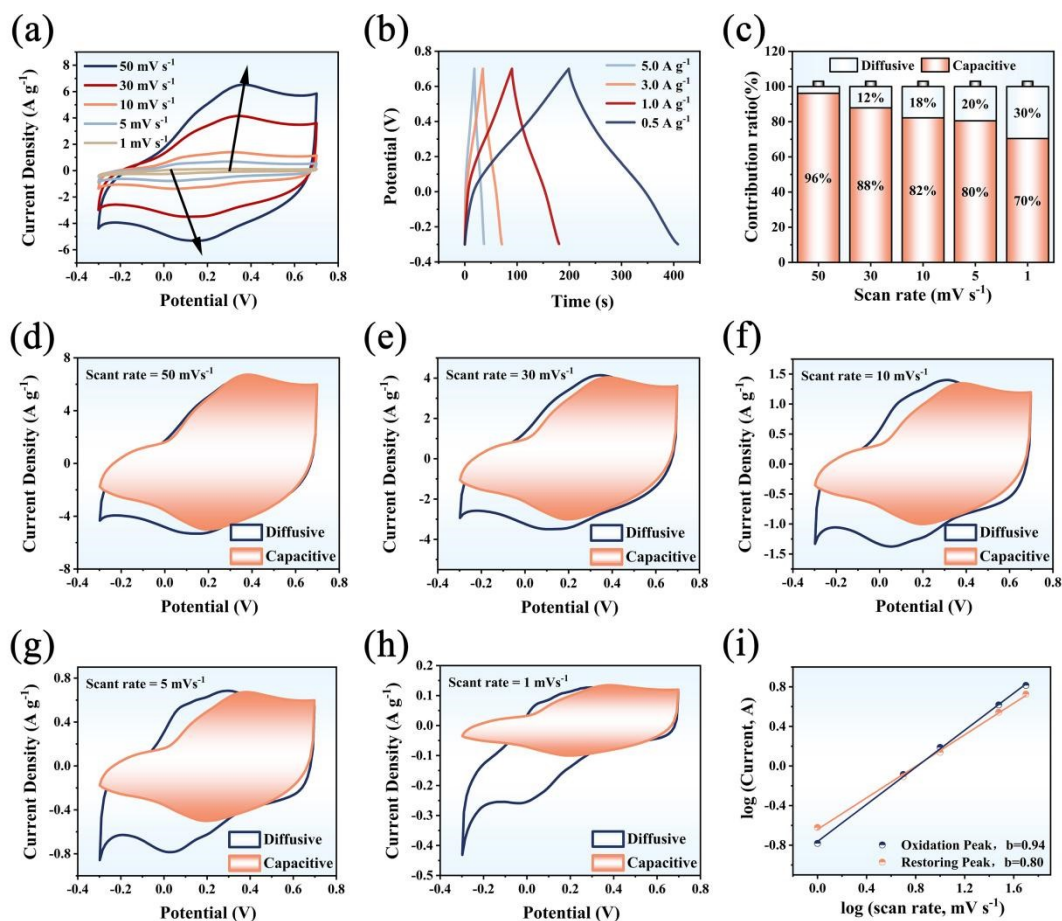

31

32 **Fig. S5.** (a) CV curves of PAAQ-PS in 1 M NH<sub>4</sub>Cl solution under different scan rates. (b) GCD curves  
 33 of PAAQ-PS at different specific currents. (c) Diffusion-limited and capacitive contributions to  
 34 capacity of PAAQ-PS at different scan rates. (d-h) Capacitive contribution of PAAQ-PS at different  
 35 scan rates. (i) Determination of b-values for various selected regions for PAAQ-PS.

36

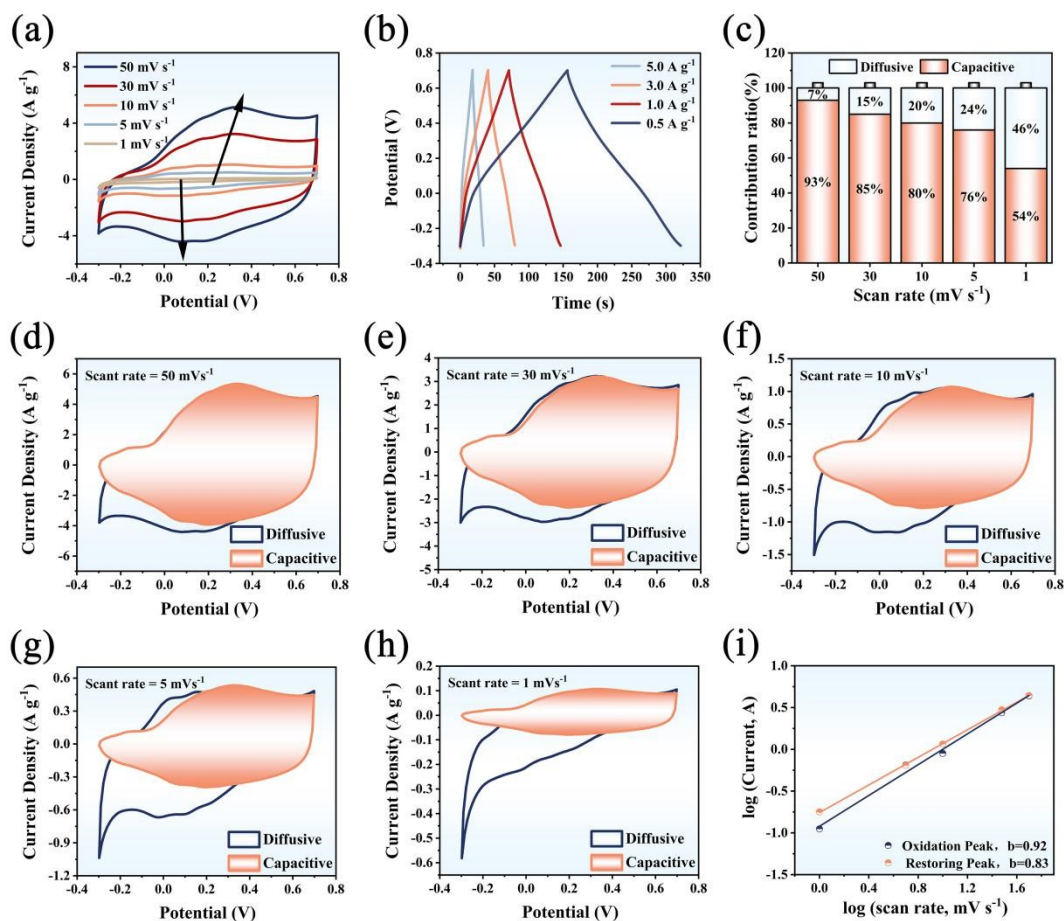

37

38 **Fig. S6.** (a) CV curves of PAAQ-P in 1 M NH<sub>4</sub>Cl solution under different scan rates. (b) GCD curves  
 39 of PAAQ-P at different specific currents. (c) Diffusion-limited and capacitive contributions to capacity  
 40 of PAAQ-P at different scan rates. (d-h) Capacitive contribution of PAAQ-P at different scan rates. (i)

41

Determination of b-values for various selected regions for PAAQ-P.

42

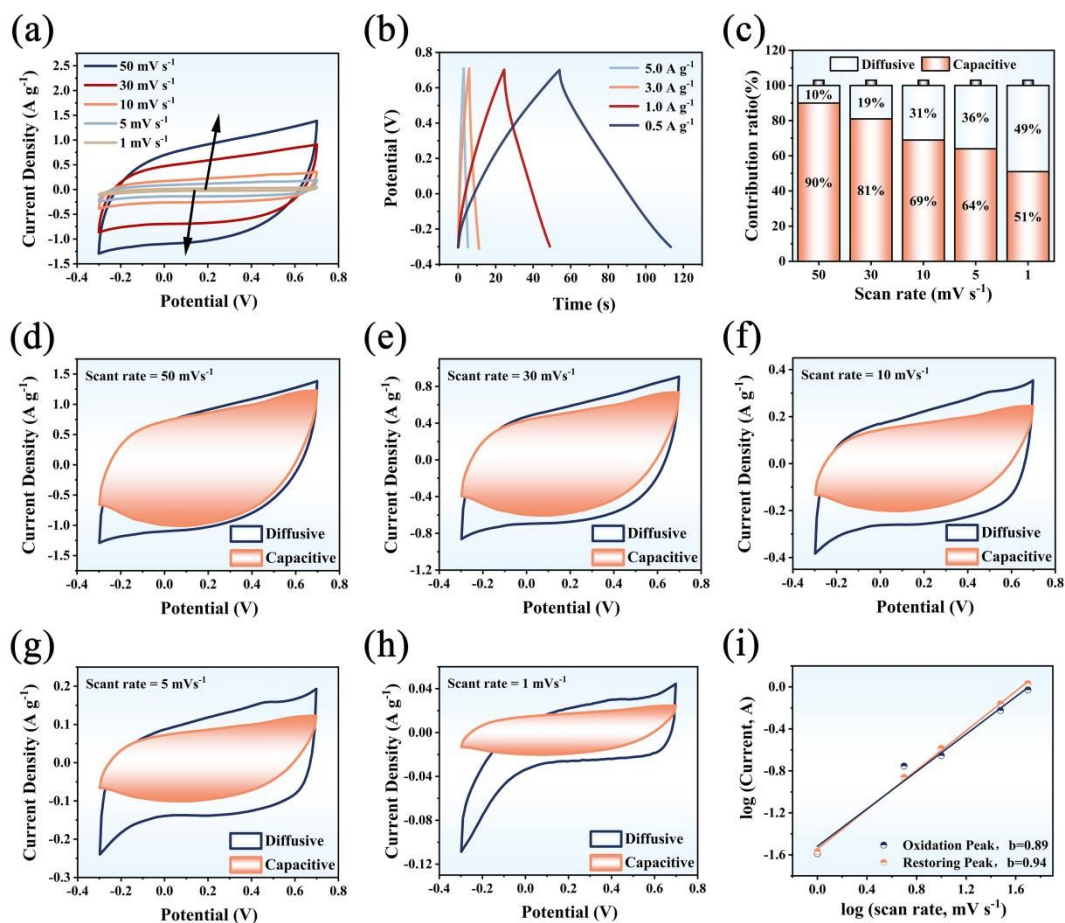

43

44 **Fig. S7.** (a) CV curves of PAAQ-S in 1 M NH<sub>4</sub>Cl solution under different scan rates. (b) GCD curves  
 45 of PAAQ-S at different specific currents. (c) Diffusion-limited and capacitive contributions to capacity  
 46 of PAAQ-S at different scan rates. (d-h) Capacitive contribution of PAAQ-S at different scan rates. (i)

47

Determination of b-values for various selected regions for PAAQ-S.

48

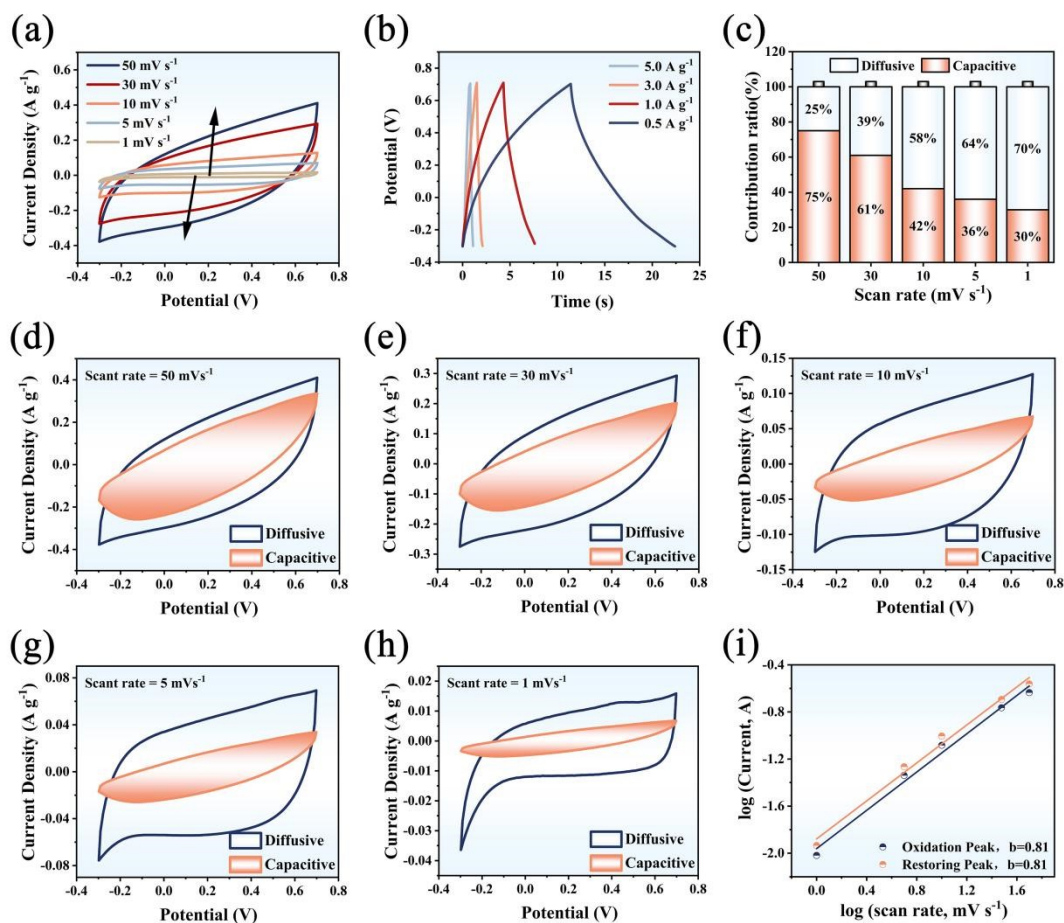

49

50 **Fig. S8.** (a) CV curves of AAQ in 1 M NH<sub>4</sub>Cl solution under different scan rates. (b) GCD curves of  
 51 AAQ at different specific currents. (c) Diffusion-limited and capacitive contributions to capacity of  
 52 AAQ at different scan rates. (d-h) Capacitive contribution of AAQ at different scan rates. (i)  
 53 Determination of b-values for various selected regions for AAQ.

54

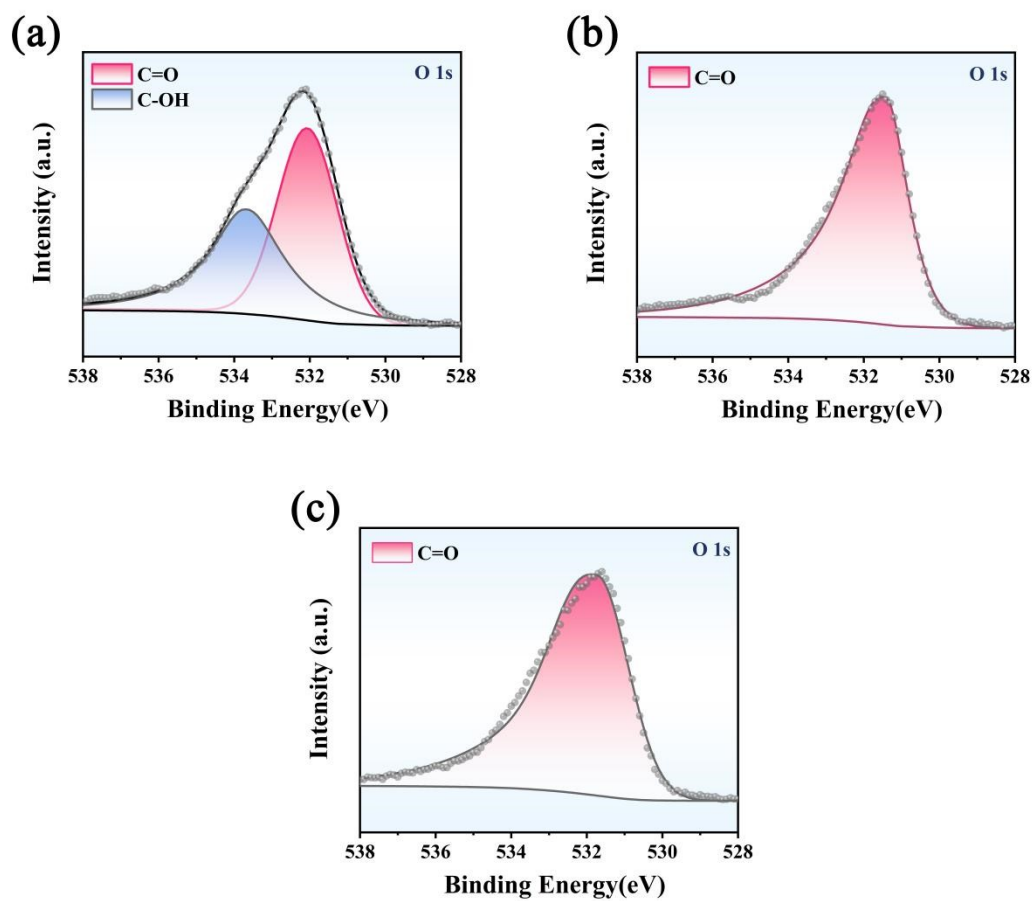

55

56 Fig. S9. High-resolution XPS spectra of O 1s for (a) PAAQ-P, (b) PAAQ-S and (c) AAQ after  
 57 CDI.
